# Supplementary material for: 19q13.11 microdeletion concomitant with ins(2;19)(p25.3;q13.1q13.4)dn in a boy: potential role of UBA2 in the associated phenotype
Source: PubMed Central journal article supplement (PMC4266984; doi:10.1186/s13039-014-0061-z), 2014-12-12
Supplement: 13039_2014_61_MOESM1_ESM.pdf [file 13039_2014_61_MOESM1_ESM.pdf]

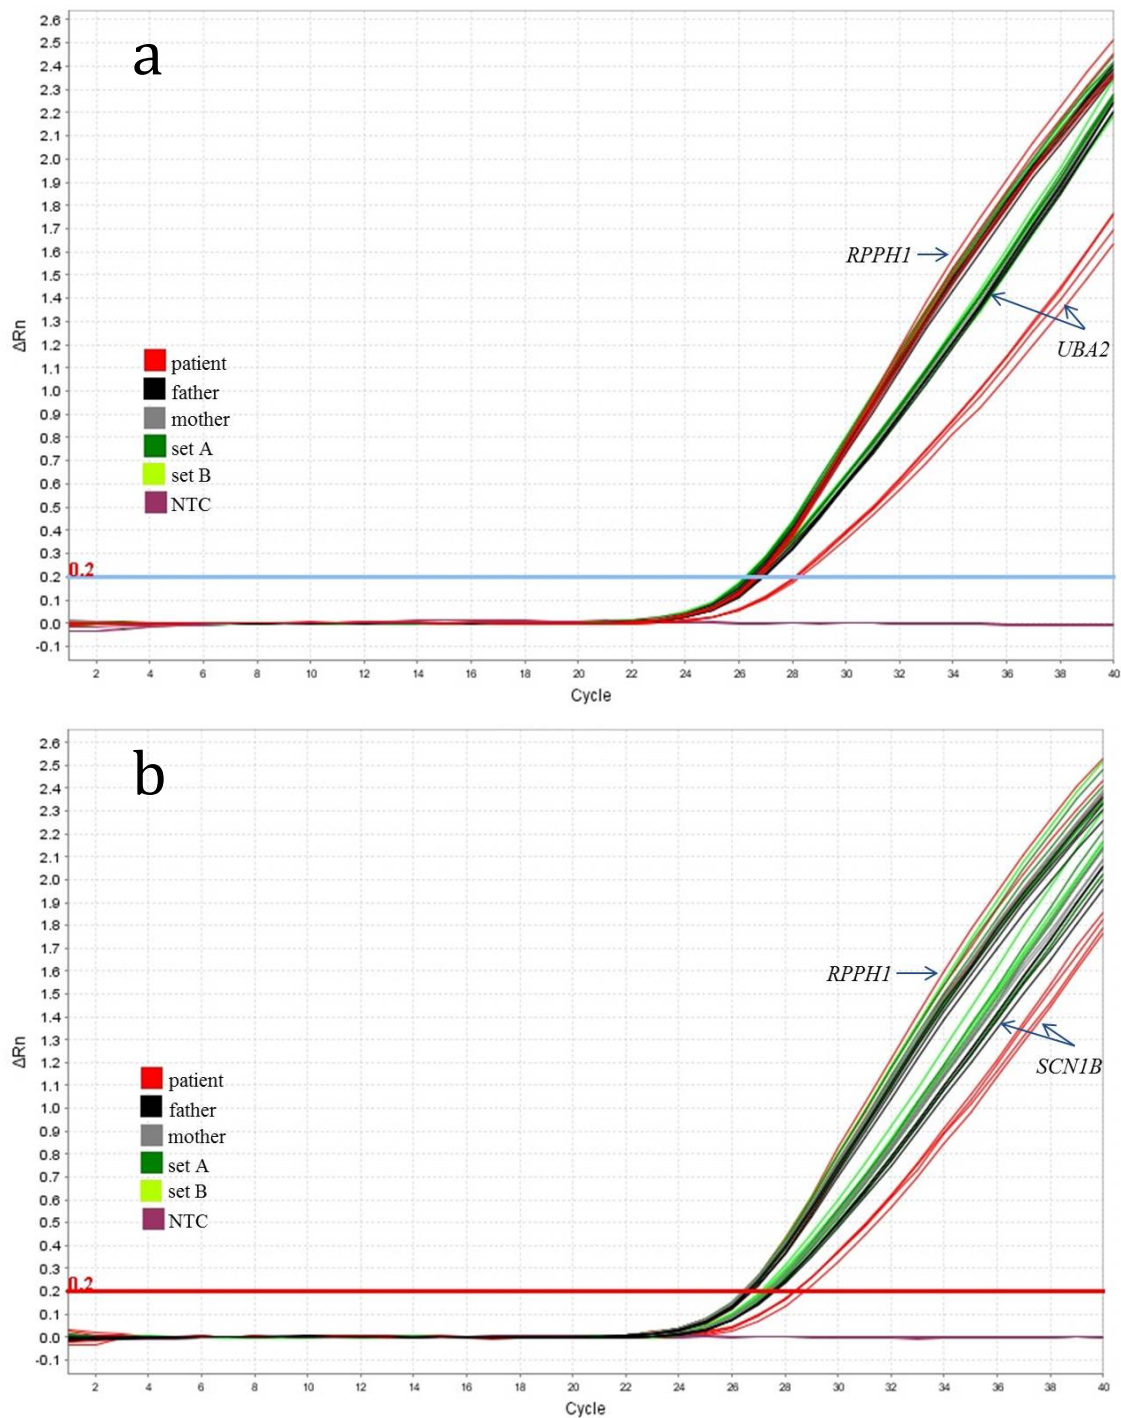

**Additional Figure A1.** Trio quantitative PCR analyses confirmed the *de novo* deletion of the (a) *UBA2* and (b) *SCN1B* genes in the proband. The patient's sample showed a delayed amplification curve relative to his parents and control samples, indicating a single copy of each gene. The amplification curve of each sample is according to the colour chart at the left, and target genes are indicated with arrows. The ribonuclease P-RNA component H1 gene (*RPPHI*) was used as a diploid reference assay, and two different sets of pooled samples were included for comparison (sets A and B, 10 healthy controls each). Assays were performed in quadruplicate.
